# Supplementary material
Source: PubMed Central journal article supplement (PMC3182535)
Supplement: NIHMS36642-supplement-supp_figs.pdf [file NIHMS36642-supplement-supp_figs.pdf]

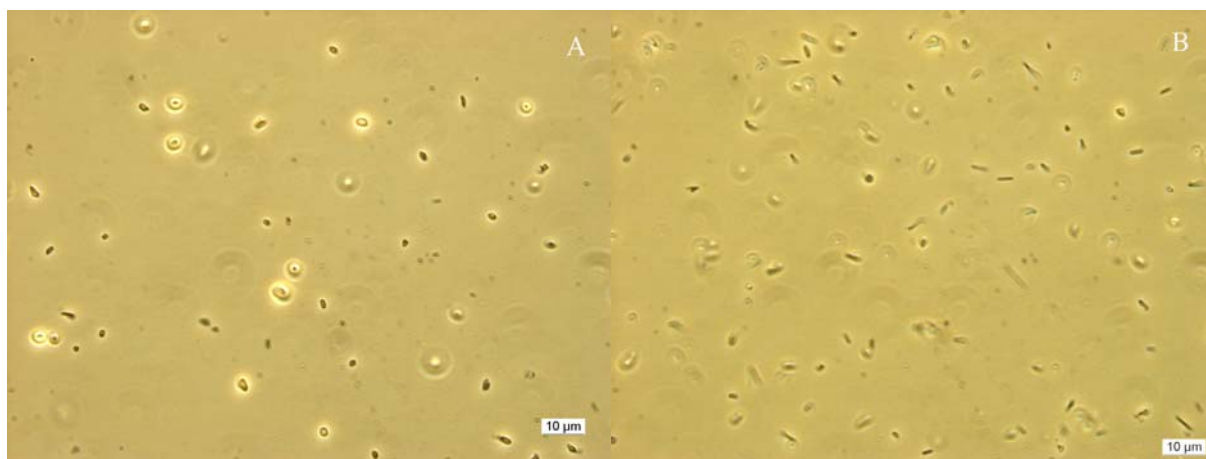

**Supplementary Fig. S1.** Phase-contrast micrographs of cells of strains Halo-G<sup>+T</sup> (A) and Naxos II (B) from liquid cultures grown under optimal conditions to late-exponential phase. Bars, 10 µm.

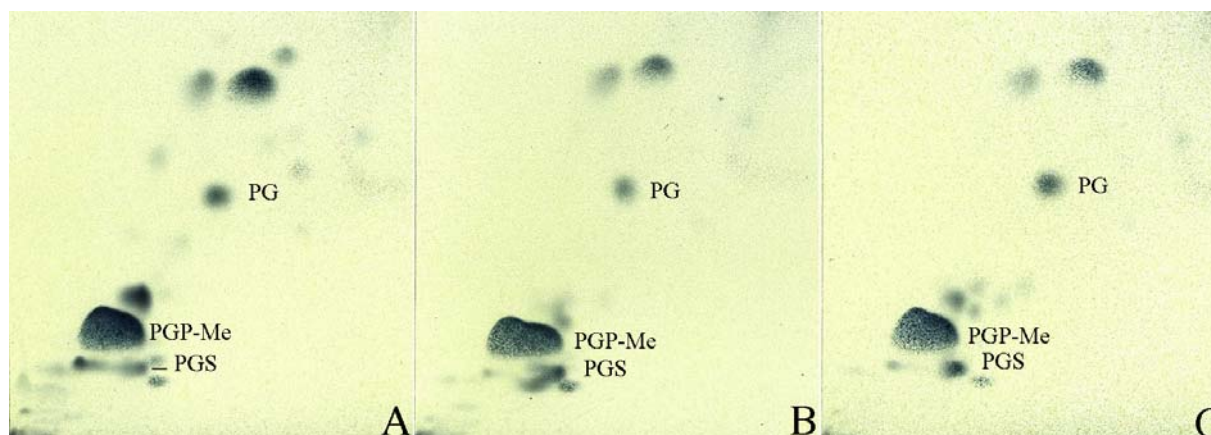

**Supplementary Fig. S2.** Two-dimensional TLC of polar lipids extracted from strains Halo-G<sup>+T</sup> (A), Naxos II (B) and AUS-1 (C). The solvent system consisted of chloroform/methanol/water (65:25:4, by vol.) in the first dimension and chloroform/methanol/glacial acetic acid/water (80:12:15:4, by vol.) in the second dimension. PG, Phosphatidylglycerol; PGP-Me, phosphatidylglycerol methylphosphate; PGS, phosphatidylglycerolsulfate.
